# Supplementary material for: Computer work and musculoskeletal and asthenopic complaints among schoolteachers: A pilot study utilizing video consultation for occupational health assessment
Source: Research Square preprint supplement (doi:10.21203/rs.3.rs-8270422/v1), 2026-01-13
Supplement: Supplementary file 1 [file 82761a96d53094c8b5a9b6b2.docx]

**Appendix**

**Table A1** Overview of the variables

| **Variables** | **Answer option** |
| --- | --- |
| **1. Sociodemographic** | |
| a) Age (years) | Free-response question |
| b) Gender | 0 = Male; 1 = Female |
| c) School types | 1 = Vocational school; 2 = Special needs school; 3 = Elementary school; 4 = Grammar school; 5 = Overall school; 6 = Secondary school; 7 = Study seminar |
| d) Employment status | 0 = Civil servants; 1 = Employees |
| e) Management function | 0 = No; 1 = Yes |
| **2. Computer work conditions**  **2.1 Computer work time** | |
| a) Hours/day computer work at school | Free-response question; numeric |
| b) Hours/day computer work at home for school | Free-response question; numeric |
| **2.2 Main activity on the computer** | |
| a) Preparing lessons | 0 = No; 1 = Yes |
| b) Administrative activities | 0 = No; 1 = Yes |
| c) Teaching | 0 = No; 1 = Yes |
| d) Conferences | 0 = No; 1 = Yes |
| **2.3 Kind of device used** | |
| a) Stationary computer | 0 = No; 1 = Yes |
| b) Laptop | 0 = No; 1 = Yes |
| c) Tablet | 0 = No; 1 = Yes |
| d) Smartboard | 0 = No; 1 = Yes |
| **3. Ergonomic conditions** | |
| a) Distance to screen; Approximately an arm's length (50-70 cm) | 0 = No; 1 Yes |
| b) Overhead lighting sufficient | 0 = No; 1 = Yes |
| c) Height-adjustable desk | 0 = No; 1 = Yes |
| - Work standing at the computer workstation | - 0 = No; 1 = Yes |
| d) Workplace parallel to the incidence of light | 0 = No; 1 = Yes |
| e) Office chair | 0 = No; 1 = Yes |
| f) Office chair height-adjustable | 0 = No; 1 = Yes |
| - Office chair height adjusted for personnel needs? | - 0 = No; 1 = Yes |
| g) Office chair armrests | 0 = No; 1 = Yes |
| h) Office chair armrests height-adjustable | 0 = No; 1 = Yes |
| - Armrests height adjusted for personnel needs? | - 0 = No; 1 = Yes |
| i) Screen straight line of sight | 0 = No; 1 = Yes |
| j) Top of screen at maximum eye level | 0 = No; 1 = Yes |
| **4. Specific complaints** | |
| **4.1 Asthenopic complaints** |  |
| a) Dry eyes | 0 = No; 1 = Yes |
| b) Itchy eyes | 0 = No; 1 = Yes |
| c) Burning eyes | 0 = No; 1 = Yes |
| d) Eye pain | 0 = No; 1 = Yes |
| **4.2 Shoulder-neck-/lower back pain** |  |
| a) Shoulder-neck pain | 0 = No; 1 = Yes |
| b) Lower back pain | 0 = No; 1 = Yes |

**Table A2** Sociodemographic characteristics of the study cohort and the basic population of school staff (school year 2022/2023)

|  |  | | **Study cohort** | **Basic population of school staff (school year 2022/2023)** |
| --- | --- | --- | --- | --- |
|  |  | | **n = 103** | **N = 48,706** |
| **Gender** | | | | |
| Female | | 74 (71.8%) | | 72.6% |
| Male | | 29 (28.2%) | | 27.4% |
| **Age (years)** | | 27-64 (Median: 47) | | 17-66 (Median:43) |
| **Employment status** | | | | |
| Civil servants | | 100 (97.1%) | | 79.3% |
| Employees | | 3 (2.9%) | | 20.7% |
| **Management function** | | | | |
| Yes | | 42 (40.8%) | | No data available |
| No | | 61 (59.2%) | | No data available |
| **School types** | | | | |
| Vocational school | | 12 (11.7%) | | 10.7% |
| Special school | | 12 (11.7%) | | 10.8% |
| Elementary school | | 50 (48.5%) | | 28.2% |
| Grammar school | | 9 (8.7%) | | 20.2% |
| Overall school | | 15 (14.6%) | | 9.3% |
| Secondary school | | 5 (4.9%) | | 16.1% |
| Study seminar | | 0 (0%) | | 4.7% |

**Table A3** Frequency distribution of computer work conditions (N=103)

| **Computer work conditions** | **N (%)** |
| --- | --- |
| **Main activities on the computer** |  |
| Preparing lessons (yes) | 84 (81.6%) |
| Administrative activities (yes) | 70 (68.0%) |
| Teaching (yes) | 41 (39.8%) |
| Conferences (yes) | 11 (10.7%) |
| **Device** |  |
| Stationary computer (yes) | 59 (57.3%) |
| Laptop computer (yes) | 83 (80.6%) |
| Tablet (yes) | 65 (63.1%) |
| Smartboard (yes) | 45 (43.7%) |

**Table A4** Frequency distribution of ergonomic conditions (N=103)

| **Ergonomic conditions** | **N (%)** |
| --- | --- |
| Distance of the screen, approximately an arm’s length 50-70 cm (yes) | 82 (79.6%) |
| Overhead lighting sufficient (yes) | 84 (81.6%) |
| Office chair (yes) | 79 (76.7%) |
| Office chair height-adjustable (yes) | 81 (78.6%) |
| - Height of your chair for your personal needs (yes) | - 75 (92.6%) |
| Screen straight line of sight (yes) | 68 (66.0%) |
| Top of screen at maximum eye level (yes) | 66 (64.1%) |
| Workplace parallel to the incidence of light (yes) | 68 (66.0%) |
| Office chair armrests (yes) | 65 (63.1%) |
| Office chair armrests height-adjustable (yes) | 38 (36.9%) |
| - Armrests adjusted for personal needs (yes) | - 30 (78.9%) |
| Height adjustable desk (yes) | 8 (7.8%) |
| - Work standing at the computer workstation (yes) | - 5 (62.5%) |

**Table A5** Frequency distributions of complaints regarding the eyes, back and shoulder-neck areas (N=103)

| **Complaints** | **N (%)** |
| --- | --- |
| **Asthenopic symptoms** |  |
| Dry eyes (yes) | 45 (43.7%) |
| Itchy eyes (yes) | 11 (10.7%) |
| Burning eyes (yes) | 10 (9.7%) |
| Eye pain (yes) | 5 (4.9%) |
| **Asthenopic symptoms index** |  |
| No symptoms | 54 (52.4%) |
| One symptom | 33 (32.0%) |
| Two symptoms | 12 (11.7%) |
| Three symptoms | 2 (1.9%) |
| Four symptoms | 2 (1.9%) |
| Shoulder-neck area (yes) | 59 (57.3%) |
| Back area (yes) | 31 (30.1%) |
